# Supplementary material
Source: Springer Nature journal article supplement (https://www.springermedizin.de/resource/supplementary/12882_2012_547_MOESM1_ESM.pdf/9454288)
Supplement: MOESM1 [file 9454288]

## ORAL HYGIENE HABITS QUESTIONNAIRE

1. When did you make the latest dental visit?<sup>[7]</sup>

- 1  less than 3 months ago
- 2  from 3 to 6 months ago
- 3  1 year ago
- 4  I don't remember

2. What time did you start dental care?<sup>[8]</sup>

- 1  teenager
- 2  about 20 years old
- 3  about 30 years old
- 4  after 30 years old

3. How many time, in a day, do you wash your teeth?<sup>[9]</sup>

- 1  never
- 2  once
- 3  twice
- 4  3 times

4. Do you use mouthwash?<sup>[10]</sup>

- 0  no
- 1  yes

5. Do you use dental floss?<sup>[11]</sup>

- 0  no
- 1  yes

6. How often do you change your toothbrush?<sup>[12]</sup>

- 1  every 3 months
- 2  every 6 months
- 3  every year
- 4  as occur

7. How long do you take for oral hygiene?<sup>[13]</sup>

- 1  about 1 minute
- 2  about 2 minute
- 3  more than 2 minutes
- 4  I don't know
